# Supplementary material
Source: Springer Nature journal article supplement (https://www.springermedizin.de/resource/supplementary/12974_2011_442_MOESM7_ESM.pdf/9601298)

A

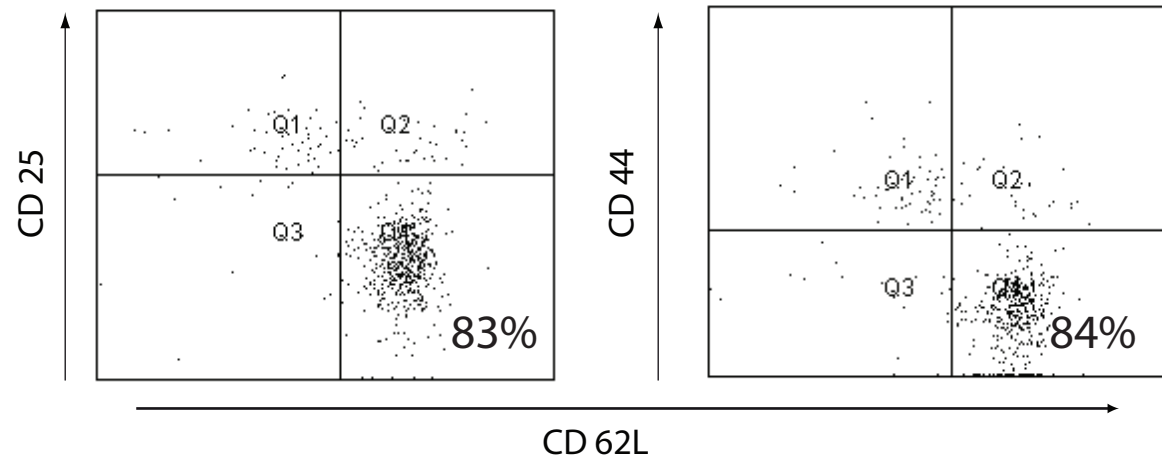

C

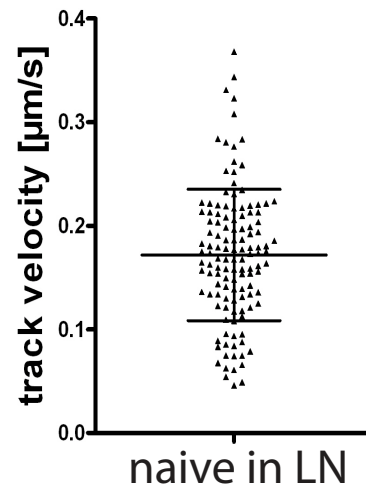

B

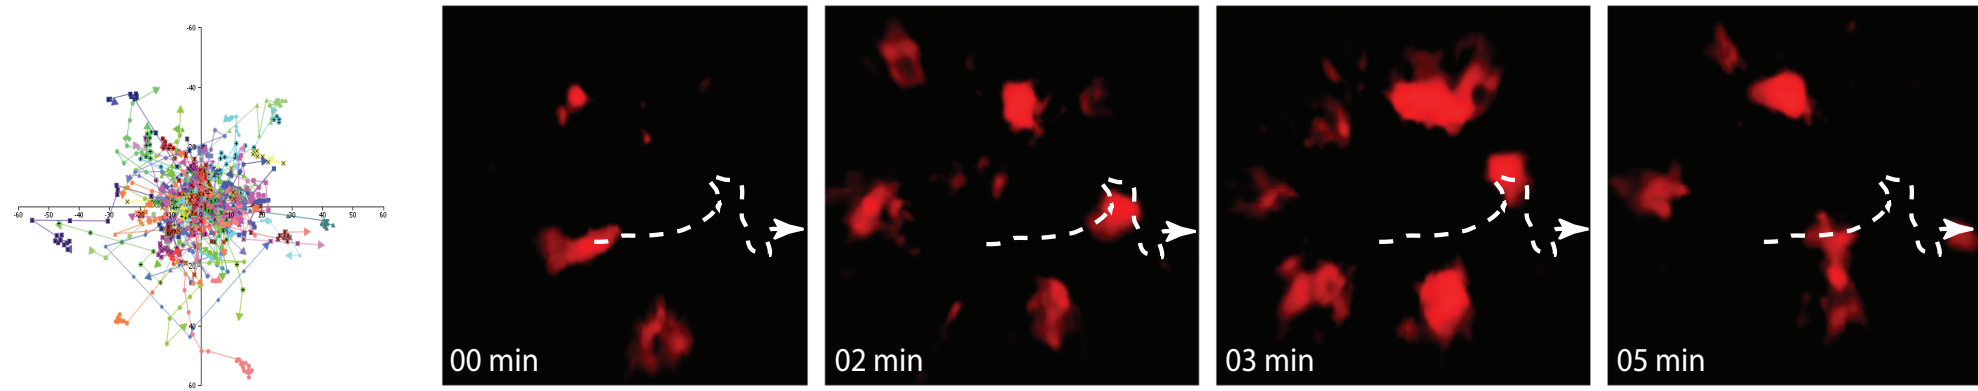

Supplement: MOESM7 [file 9601298]
